# Supplementary material
Source: Springer Nature journal article supplement (https://www.springermedizin.de/resource/supplementary/12879_2006_407_MOESM1_ESM.pdf/9448606)

**Attack rates per 1,000**

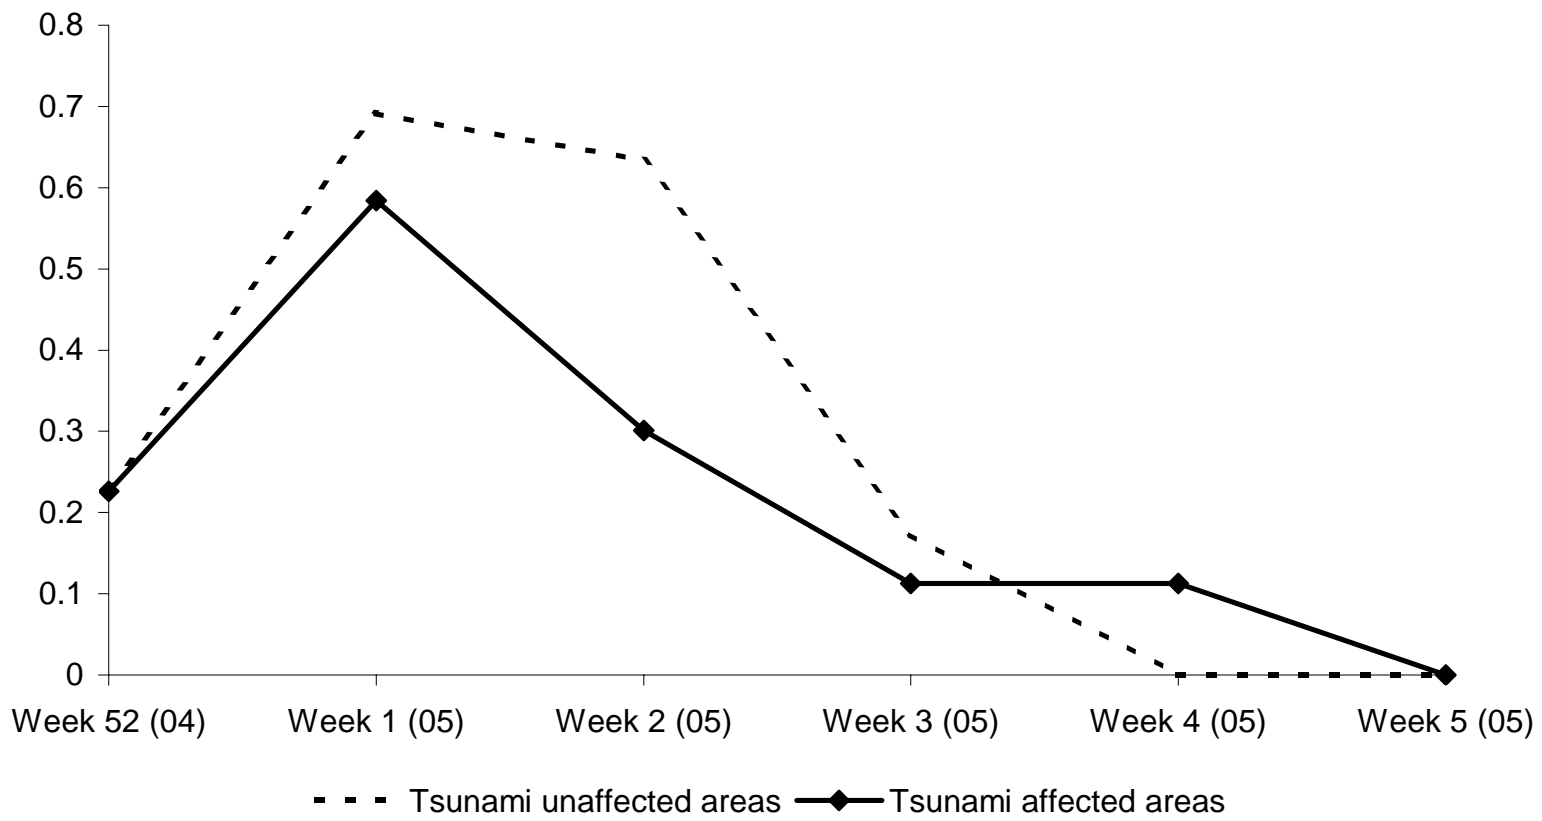

Supplement: MOESM1 [file 9448606]
